# Supplementary material for: Long-lasting behavioral, molecular and functional connectivity alterations after chronic exposure to THC in adolescent mice
Source: Research Square preprint supplement (doi:10.21203/rs.3.rs-4830650/v1), 2024-09-17
Supplement: Supplementary file 1 [file 02767b9d16df32632e35916c.xlsx]

## Sheet: Table 1
Table 1. Functional network metrics of THC-treated mice during adolescence and adulthood
			Mice exposed to THC during adolescence														Mice exposed to THC during adulthood
			VEH male			VEH female			THC male			THC female					VEH male			VEH female			THC male			THC female
(A) Global network metrics
	Weigthed
		Global efficiency	0.09916	±	0.001903	0.1034	±	0.001818	0.1003	±	0.001174	0.09917	±	0.001283			0.104	±	0.00188	0.09992	±	0.001749	0.1021	±	0.00173	0.1009	±	0.002272
		Local efficiency	0.1032	±	0.002121	0.1052	±	0.001495	0.1044	±	0.001352	0.1042	±	0.0013			0.1107	±	0.002217	0.1084	±	0.003269	0.1084	±	0.002326	0.1043	±	0.001991
		Clustering coefficient	0.09364	±	0.001394	0.0963	±	0.001285	0.09541	±	0.001564	0.09346	±	0.001157			0.09634	±	0.001398	0.09349	±	0.001059	0.09471	±	0.001254	0.09502	±	0.001767
		Network strenght	10.35	±	0.04234	10.42	±	0.03735	10.37	±	0.02092	10.38	±	0.0229			10.47	±	0.03295	10.45	±	0.06639	10.45	±	0.03205	10.4	±	0.04194
	Binary
		Global efficiency	0.7696	±	0.00146	0.7665	±	0.002734	0.7674	±	0.002315	0.7742	±	0.002234			0.7663	±	0.002437	0.77	±	0.002089	0.7706	±	0.002399	0.7715	±	0.002257
		Local efficiency	0.768	±	0.001509	0.7659	±	0.002216	0.766	±	0.001867	0.7705	±	0.002017			0.7668	±	0.001972	0.7694	±	0.00218	0.7702	±	0.001844	0.7688	±	0.002174
		Clustering coefficient	0.5854	±	0.002732	0.5796	±	0.005144	0.5813	±	0.004324	0.5943	±	0.00415			0.5828	±	0.002711	0.586	±	0.003899	0.5869	±	0.00449	0.589	±	0.004163
		Network degree	22.97	±	0.1237	22.8	±	0.1818	22.81	±	0.1531	23.18	±	0.1654			22.88	±	0.1617	23.09	±	0.1787	23.15	±	0.1512	23.04	±	0.1783
(B) Regional network metrics - Nucleus accumbens
LEFT
	Weigthed
		Clustering coefficient	0.09376	±	0.00369	0.09594	±	0.004097	0.08698	±	0.00291	0.08887	±	0.003654			0.08704	±	0.003852	0.09481	±	0.00427	0.09334	±	0.005788	0.08965	±	0.003358
		Network strenght	10.21	±	0.1117	10.35	±	0.06763	10.48	±	0.03491	10.5	±	0.1109			10.32	±	0.0629	10.45	±	0.1488	10.34	±	0.1068	10.42	±	0.09307
		Efficiency	0.0974	±	0.004043	0.1025	±	0.003174	0.1013	±	0.004666	0.09897	±	0.003856			0.09559	±	0.003726	0.1031	±	0.003569	0.1004	±	0.005972	0.09704	±	0.003633
	Binary
		Clustering coefficient	0.6068	±	0.01048	0.5837	±	0.009378	0.5789	±	0.005082	0.5785	±	0.00888			0.5806	±	0.008142	0.5904	±	0.008318	0.5904	±	0.01221	0.5902	±	0.009039
		Network degree	22.56	±	0.5031	23	±	0.7993	23.89	±	0.7536	24.6	±	0.7333			23.88	±	0.6928	24.29	±	0.5216	23.1	±	0.8226	23.29	±	0.8081
		Efficiency	0.7801	±	0.004878	0.7689	±	0.004909	0.7674	±	0.002409	0.7679	±	0.004183			0.7683	±	0.004325	0.7727	±	0.003523	0.7723	±	0.006195	0.7724	±	0.005
(C) Regional network metrics - Caudate Putamen
LEFT
	Weigthed
		Clustering coefficient	0.09261	±	0.003517	0.09009	±	0.003397	0.09424	±	0.003557	0.09169	±	0.003039			0.1079	±	0.006514	0.08776	±	0.003818	0.1015	±	0.005362	0.09772	±	0.004466
		Network strenght	9.995	±	0.0726	10.2	±	0.06781	10.14	±	0.08254	10.03	±	0.0544			10.19	±	0.1011	10.01	±	0.03083	10.08	±	0.06591	10.18	±	0.1095
		Efficiency	0.09326	±	0.002723	0.09606	±	0.002379	0.0977	±	0.003474	0.09294	±	0.002225			0.1081	±	0.005652	0.08894	±	0.00232	0.1014	±	0.003127	0.09639	±	0.001552
	Binary
		Clustering coefficient	0.6029	±	0.006621	0.584	±	0.01199	0.5975	±	0.01065	0.6052	±	0.01144			0.5801	±	0.006377	0.6048	±	0.01347	0.6043	±	0.006842	0.5939	±	0.01374
		Network degree	22	±	0.6667	23.22	±	0.8625	22.11	±	0.4843	21.67	±	0.3333			20.38	±	0.9437	22.63	±	0.7778	21.4	±	0.9214	21.86	±	0.9619
		Efficiency	0.7774	±	0.003099	0.7643	±	0.003447	0.775	±	0.005226	0.7789	±	0.005734			0.7638	±	0.003535	0.779	±	0.006465	0.7772	±	0.003755	0.7726	±	0.006261
(A) Global network metrics of the functional connectomes. Global metrics of the weighted (A.1) and binary (A.2) functional connectome. (B) Regional network metrics of the functional connectomes. Functional regional network metrics of the weighted (B.1) and binary (B.2) functional connectome. No statistically significant differences between groups were found after FDR correction. Mean + SEM (n=6-1…
