# Supplementary material for: Long-lasting behavioral, molecular and functional connectivity alterations after chronic exposure to THC in adolescent mice
Source: Research Square preprint supplement (doi:10.21203/rs.3.rs-4830650/v1), 2024-09-17
Supplement: Supplementary file 2 [file f4a93bae03873639ad95f336.xlsx]

## Sheet: T2 Correlations-behaviour+fMRI
Table 2. Correlations between behaviour and functional connectivity
				Behavioural variables
				%PPI 70dB	%PPI 75dB	%PPI	%Topen	NORT	SI	SMI							%PPI	%Topen	NORT	SI	SMI
	Intrahemispheric											Interhemispheric
	Seed region											Seed region
		Caudate-putamen left											Caudate-putamen left
	Targeted areas											Targeted areas
		Entorhinal Piriform Insular left	p-value	0.895383	0.904488	N.S.	N.S.	N.S.	0.0565818	N.S.			Entorhinal Piriform Insular right	p-value	0.874353	0.874353	N.S.	N.S.	N.S.	N.S.	N.S.
			r	0.0843704	0.0247722	0.127529	0.0328405	-0.19499	0.378381	-0.122248				r	0.045936	-0.0468861	0.100217	0.103359	-0.12582	0.275968	-0.109173
		cingulate left	p-value	0.895383	0.895383	N.S.	N.S.	N.S.	N.S.	N.S.			cingulate right	p-value	0.591596	0.874353	N.S.	N.S.	N.S.	p<0.05	N.S.
			r	0.0764151	-0.0727895	0.0276314	0.122807	-0.197122	0.282684	-0.0391807				r	0.181088	0.0486576	0.122522	0.0920465	-0.130851	0.404953	-0.129481
		hippocampus left	p-value	0.895383	0.895383	N.S.	N.S.	N.S.	N.S.	N.S.			hippocampus right	p-value	0.702979	0.907187	N.S.	N.S.	N.S.	p<0.05	N.S.
			r	0.0473281	-0.0981384	0.0480856	0.0463105	0.0337616	0.22025	-0.216601				r	0.0984926	0.0258262	0.147241	0.00741633	-0.196655	0.382798	-0.166606
		mPFC left	p-value	0.895383	0.837376	N.S.	N.S.	N.S.	N.S.	N.S.			mPFC right	p-value	0.907187	0.702979	N.S.	N.S.	N.S.	p<0.05	N.S.
			r	0.0506388	-0.116861	-0.00880332	0.0390635	-0.211642	0.196014	0.00440303				r	0.0243794	-0.0952245	0.0342699	0.138356	-0.220525	0.371352	-0.0962234
		motor cortex left	p-value	0.895383	0.832078	N.S.	N.S.	N.S.	N.S.	N.S.			motor cortex right	p-value	0.874353	0.951773	N.S.	N.S.	N.S.	N.S.	N.S.
			r	-0.0689207	-0.129914	0.0373783	0.107768	-0.12301	0.245095	-0.0606776				r	0.0541775	-0.00814388	0.0661955	0.154601	-0.179116	0.27629	-0.0731367
		sensory cortex + parietal association left	p-value	0.895383	0.895383	N.S.	N.S.	N.S.	N.S.	N.S.			sensory cortex + parietal association right	p-value	0.728076	0.885205	N.S.	N.S.	N.S.	N.S.	N.S.
			r	-0.0341337	-0.092813	0.0425617	0.016834	-0.0819892	0.270714	-0.222989				r	0.085396	0.0404504	0.162027	-0.0356599	-0.0156682	0.205045	-0.15144
	Seed region											Seed region
		Nucleus accumbens left											Nucleus accumbens left
	Targeted areas											Targeted areas
		Entorhinal Piriform Insular left	p-value	0.969809	0.969809	N.S.	N.S.	N.S.	N.S.	N.S.			Entorhinal Piriform Insular right	p-value	0.977589	0.858568	N.S.	N.S.	N.S.	N.S.	N.S.
			r	0.0921915	0.115916	0.169184	0.0380538	-0.104989	0.29601	-0.0187588				r	0.00347091	0.0570599	0.11825	0.0515049	-0.100798	0.222037	0.0725078
		cingulate left	p-value	0.969809	0.969809	N.S.	N.S.	N.S.	0.0685885	N.S.			cingulate right	p-value	0.858568	0.881864	N.S.	N.S.	N.S.	N.S.	N.S.
			r	0.0772762	0.00868827	0.0216573	0.0643508	-0.160189	0.372279	-0.00819479				r	0.0458886	0.0357643	0.0932932	-0.116851	-0.0735942	0.313785	-0.0861187
		hippocampus left	p-value	0.969809	0.969809	N.S.	N.S.	N.S.	N.S.	N.S.			hippocampus right	p-value	0.963337	0.858568	N.S.	N.S.	N.S.	N.S.	N.S.
			r	0.0342927	-0.00965998	0.0132858	0.0821936	-0.194212	0.267851	-0.0094261				r	-0.0199698	-0.0450161	0.0350042	0.124511	-0.0800507	0.253226	0.14096
		mPFC left	p-value	0.969809	0.969809	N.S.	N.S.	N.S.	N.S.	N.S.			mPFC right	p-value	0.858568	0.858568	N.S.	N.S.	N.S.	N.S.	N.S.
			r	0.0554756	0.0310235	0.0436131	0.210362	-0.2795	0.276778	0.0367096				r	0.152012	0.141739	0.0680119	-0.00447223	-0.271877	0.237536	0.010549
		motor cortex left	p-value	0.969809	0.969809	N.S.	N.S.	N.S.	N.S.	N.S.			motor cortex right	p-value	0.858568	0.858568	N.S.	N.S.	N.S.	N.S.	N.S.
			r	-0.0456365	-0.101198	0.00462738	0.115149	-0.0351452	0.2194	0.03054				r	-0.0562899	-0.0739798	0.093543	0.0609619	-0.0525784	0.197486	-0.0730174
		sensory cortex + parietal association left	p-value	0.969809	0.969809	N.S.	N.S.	N.S.	N.S.	N.S.			sensory cortex + parietal association right	p-value	0.858568	0.858568	N.S.	N.S.	N.S.	N.S.	N.S.
			r	0.0306017	0.061341	0.0984872	0.0671264	-0.0210176	0.214228	0.0313121				r	0.0991523	0.0847302	0.203646	-0.00423717	-0.168363	0.0749825	0.0583832
